# Supplementary material for: The Emerging Role of T-Cell Immunoglobulin Mucin-3 in Breast Cancer: A Promising Target For Immunotherapy
Source: Front Oncol. 2021 Aug 24;11:723238. doi: 10.3389/fonc.2021.723238 (PMC8421567; doi:10.3389/fonc.2021.723238)
Supplement: Supplementary file 1 [file Table_1.xlsx]

## Sheet: Sheet1
	The function of Tim-3 expression on immune cells in breast cancer
	Cell types	Functions	Prognosis	Reference
	TILs	Correlation with age, tumor stage and PD1/PDL1	Better DFS and OS	34
	iTILs	Correlation with stromal TILs and PD-1+ iTILs, LAG-3+ iTILs and PD-L1+ tumors	Favorable prognosis	35
	sTILs	Higher in luminal A and luminal B subtype	Without effect on DFS	36
	CD8+ T cells in cancer	Correlation with lymph node metastasis, WHO grade, and molecular subtypes	-	21
	CD8+ T cells in lymph node	Correlation with higher tumor grade and more involved lymph nodes	-	37
	Naïve and central memory CD8+ T cells	Insulin resistance	-	40
	CD4+ T cells	Lymph node metastasis	-	37
	CD4+CXCL13+follicular helper T cells	Increased PD-1, decreased CXCL13 and IL-21, inhibits cell proliferation	-	41
	CD103+ DCs	Promotes paclitaxel resistance	-	29
	TILs: tumor-infiltrating lymphocytes; PD1/PDL1: programmed cell death protein 1/programmed cell death 1 ligand 1; DFS: disease-free survival; OS: overall survival; iTILs: intra-epithelial TILs; LAG-3: lymphocyte activation gene-3; sTILs: stromal TILs.
